# Supplementary material for: Varied proton conductivity and photoreduction CO2 performance of isostructural heterometallic cluster based metal–organic frameworks
Source: Royal Society of Chemistry journal article supplement (doi:10.1039/d1qi00742d), 2021-01-01
Supplement: d1qi00742d1.pdf [file d1qi00742d1.pdf]

## Varied proton conductivity and photoreduction CO<sub>2</sub> performance in isostructural heterometallic clusters based metal–organic frameworks

Hai-Ning Wang,<sup>a</sup> Hong-Xu Sun,<sup>a</sup> Yao-Mei Fu,<sup>b</sup> Xing Meng,<sup>\*a</sup> Yan-Hong Zou,<sup>a</sup> Yu-Ou He,<sup>a</sup> Rui-Gang Yang<sup>a</sup>

<sup>a</sup>School of Chemistry and Chemical Engineering, Shandong University of Technology, Zibo 255049, People's Republic of China.

E-mail: mengxing837@foxmail.com

<sup>b</sup>Shandong Engineering Research Center of Green and High-value Marine Fine Chemical; Weifang University of Science and Technology, Shouguang 262700, People's Republic of China.

**Table S1** The Fe and M (M=Co and Ni) mole ratio in **MOF-Fe<sub>2</sub>Co** and **MOF-Fe<sub>2</sub>Ni** crystals by ICP analysis.

| Sample                      | Concentration of Fe (µg/mL) | Concentration of M (µg/mL) | Fe:M  |
|-----------------------------|-----------------------------|----------------------------|-------|
| <b>MOF-Fe<sub>2</sub>Co</b> | 8.544                       | 4.480                      | 2.009 |
| <b>MOF-Fe<sub>2</sub>Ni</b> | 9.273                       | 4.892                      | 1.997 |

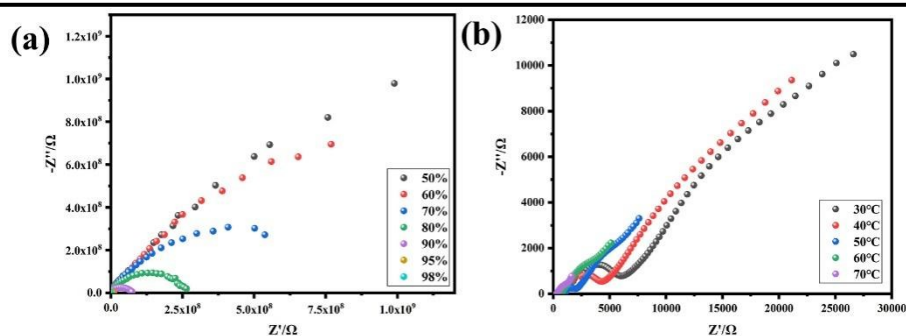

**Fig. S1** Impedance spectrum of **MOF-Fe<sub>3</sub>** at 30°C with different RHs (a) and 98 % RH under different temperatures (b).

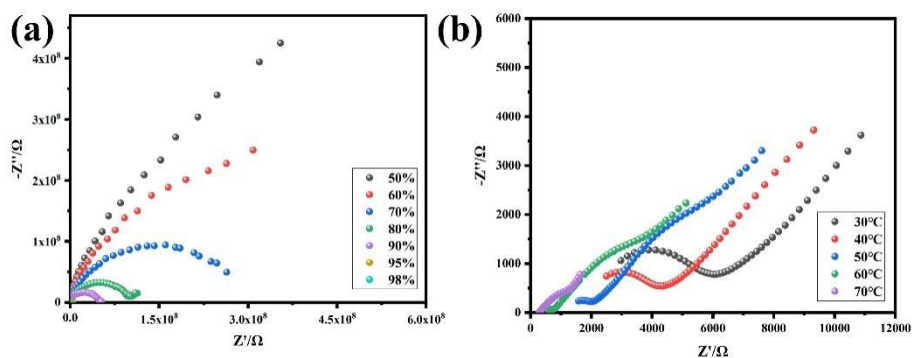

**Fig. S2** Impedance spectrum of **MOF-Fe<sub>2</sub>Co** at 30 °C with different RHs (a) and 98 % RH under different temperatures (b).

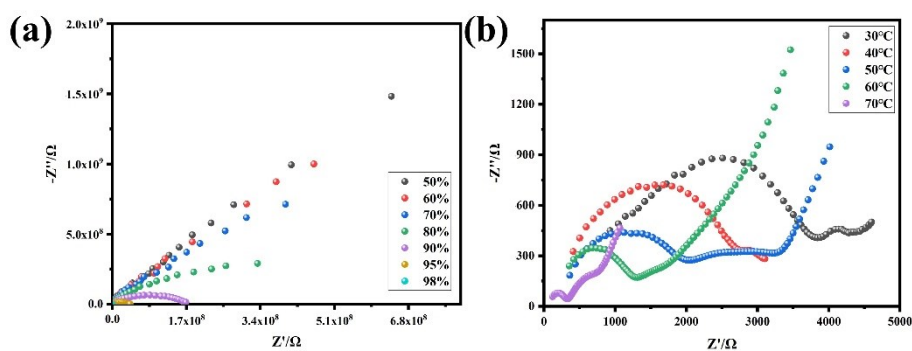

**Fig. S3** Impedance spectrum of **MOF-Fe<sub>2</sub>Ni** at 30 °C with different RHs (a) and 98 % RH under different temperatures (b).

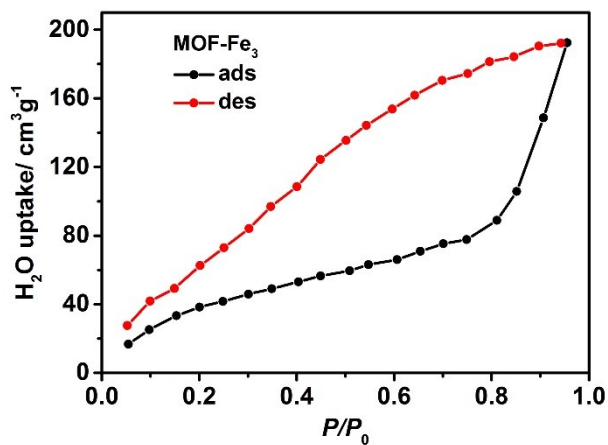

**Fig. S4** Water vapor adsorption and desorption isotherms of **MOF-Fe<sub>3</sub>**.

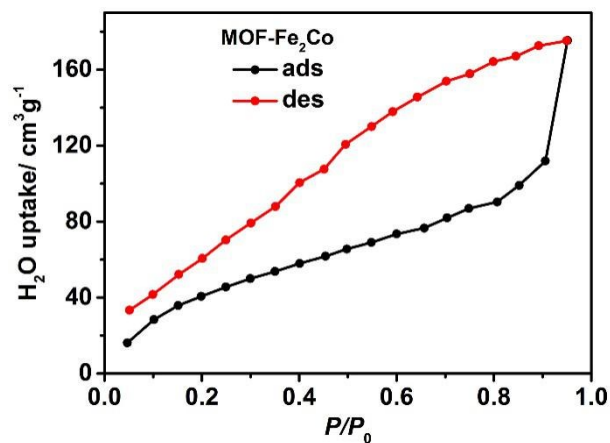

**Fig. S5** Water vapor adsorption and desorption isotherms of **MOF-Fe<sub>2</sub>Co**.

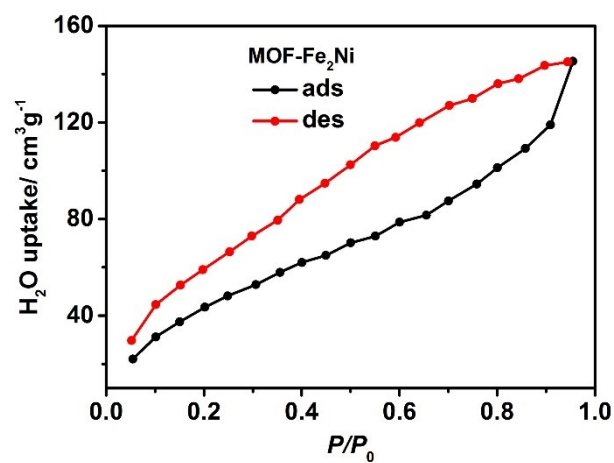

**Fig. S6** Water vapor adsorption and desorption isotherms of **MOF-Fe<sub>2</sub>Ni**.

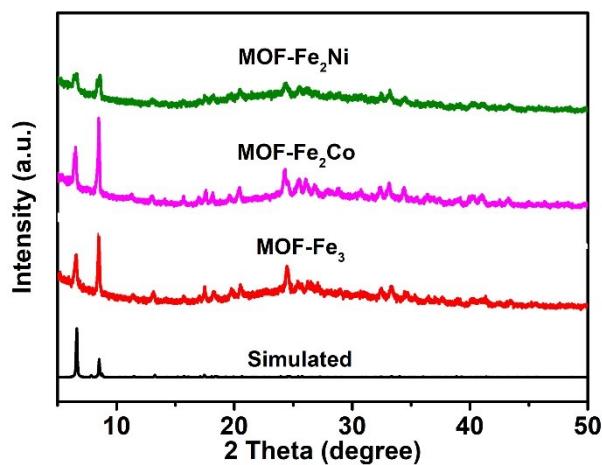

**Fig. S7** PXRD patterns of **MOF-Fe<sub>2</sub>M** after proton conductive measurements.

**Table S2** Proton conductive MOFs and their proton conductivity.

| Materials | Proton conductivity (S cm <sup>-1</sup> )<br>1) | Condition     | Refs. |
|-----------|-------------------------------------------------|---------------|-------|
| Im-Fe-MOF | $1.21 \times 10^{-2}$ S cm <sup>-1</sup>        | 60 °C, 98% RH | 1     |

|                                                                                                                                         |                                                         |               |    |
|-----------------------------------------------------------------------------------------------------------------------------------------|---------------------------------------------------------|---------------|----|
| Im@MOF-808                                                                                                                              | $3.45 \times 10^{-2} \text{ S}\cdot\text{cm}^{-1}$      | 60°C, 99% RH  | 2  |
| KAUST-7                                                                                                                                 | $2.0 \times 10^{-2} \text{ S}\cdot\text{cm}^{-1}$       | 90°C, 95% RH  | 3  |
| Co-fdc                                                                                                                                  | $4.85 \times 10^{-3} \text{ S}\cdot\text{cm}^{-1}$      | 80°C, 98% RH  | 4  |
| Im-Cu@(NENU-3a)                                                                                                                         | $3.16 \times 10^{-4} \text{ S}\cdot\text{cm}^{-1}$      | 70°C, 90% RH  | 5  |
| Ni-BDP                                                                                                                                  | $2.22 \times 10^{-3} \text{ S}\cdot\text{cm}^{-1}$      | 80°C, 97% RH  | 6  |
| $[\text{Ni}_8(\text{OH})_4(\text{H}_2\text{O})_2(\text{BDPCOOH})_6]$                                                                    | $2.22 \times 10^{-3} \text{ S}\cdot\text{cm}^{-1}$      | 80°C, 97% RH  | 6  |
| MOF-801                                                                                                                                 | $1.88 \times 10^{-3} \text{ S}\cdot\text{cm}^{-1}$      | 25°C, 98% RH  | 7  |
| $\text{Cu}^{\text{I}}\text{-MOF}\cdot\text{pz}\cdot 3\text{H}_2\text{SO}_4$                                                             | $3.0 \times 10^{-3} \text{ S}\cdot\text{cm}^{-1}$       | 70°C, 95% RH  | 8  |
| $\{\text{Na}[\text{Cd}(\text{MIDC})]\}_n$                                                                                               | $1.04 \times 10^{-3} \text{ S}\cdot\text{cm}^{-1}$      | 100°C, 98% RH | 9  |
| $(\text{H}[\text{Ln}(\text{H}_2\text{O})_4]_2[\text{MnV}_{13}\text{O}_{38}]\cdot 9\text{NMP}\cdot 17\text{H}_2\text{O})$ (Ln=Ce and La) | $4.68/3.46 \times 10^{-3} \text{ S}\cdot\text{cm}^{-1}$ | 61°C, 97% RH  | 10 |
| MFM-510                                                                                                                                 | $2.1 \times 10^{-5} \text{ S}\cdot\text{cm}^{-1}$       | 25 °C, 99% RH | 11 |
| Ho-MOF ( $[\text{Ho}(\text{SIP})(\text{H}_2\text{O})_5]\cdot 3\text{H}_2\text{O}$ )                                                     | $8.2 \times 10^{-4} \text{ S}\cdot\text{cm}^{-1}$       | 70 °C, 99% RH | 12 |
| TMOF-2                                                                                                                                  | $1.23 \times 10^{-4} \text{ S}\cdot\text{cm}^{-1}$      | 90 °C, 98% RH | 13 |
| MIT-25                                                                                                                                  | $5.1 \times 10^{-4} \text{ S}\cdot\text{cm}^{-1}$       | 75 °C, 95% RH | 14 |
| $[\text{CH}_3\text{NH}_3]_2[\text{H}_3\text{O}]\text{Ag}_5\text{Sn}_4\text{Se}_{12}\cdot \text{C}_2\text{H}_5\text{O}$                  | $2.62 \times 10^{-4} \text{ S}\cdot\text{cm}^{-1}$      | 60 °C, 99% RH | 15 |
| H                                                                                                                                       |                                                         |               |    |
| ZZU-2                                                                                                                                   | $4.63 \times 10^{-4} \text{ S}\cdot\text{cm}^{-1}$      | 98°C, 100% RH | 16 |

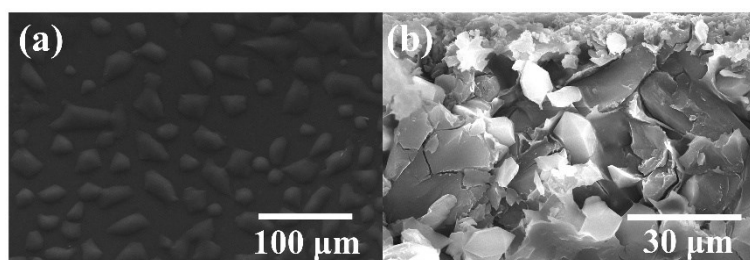

**Fig. S8** SEM images of surface (left) and cross section (right) of **MOF-Fe<sub>3</sub>@PP-20** composite membrane.

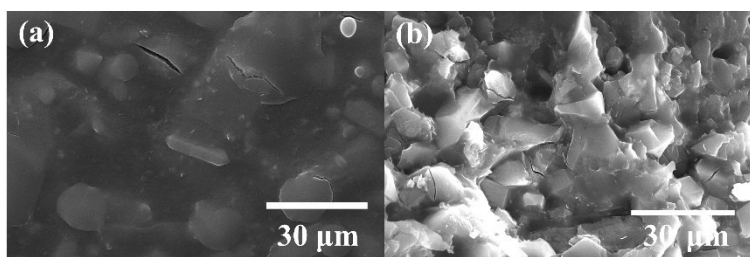

**Fig. S9** SEM images of surface (left) and cross section (right) of **MOF-Fe<sub>3</sub>@PP-40** composite membrane.

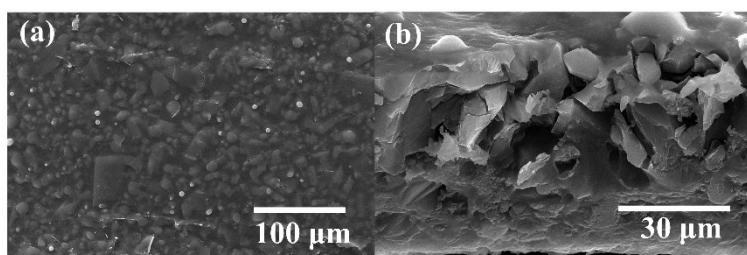

**Fig. S10** SEM images of surface (left) and cross section (right) of **MOF-Fe<sub>3</sub>@PP-60** composite membrane.

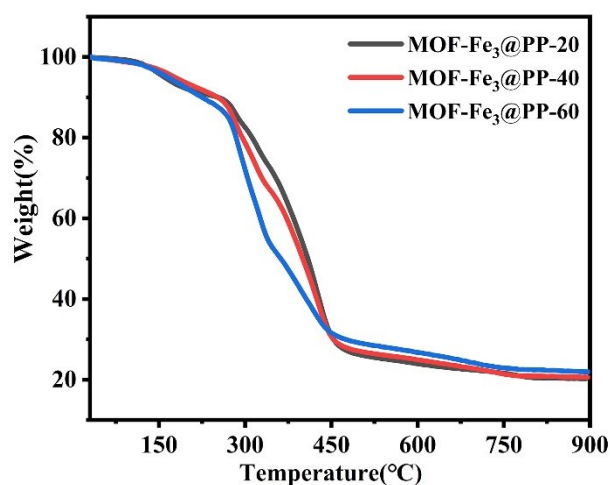

**Fig. S11** The TG plots of three membranes.

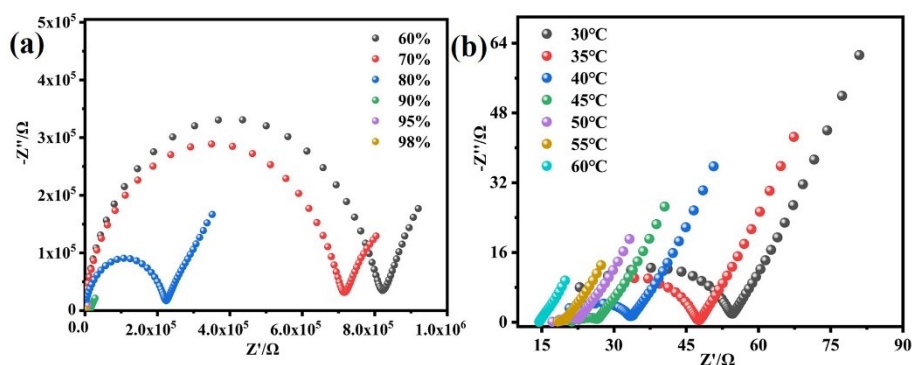

**Fig. S12** Impedance spectra of **MOF-Fe<sub>3</sub>@PP-20** composite membrane at 30 °C with different RHs (a) and 98% RH under different temperatures (b).

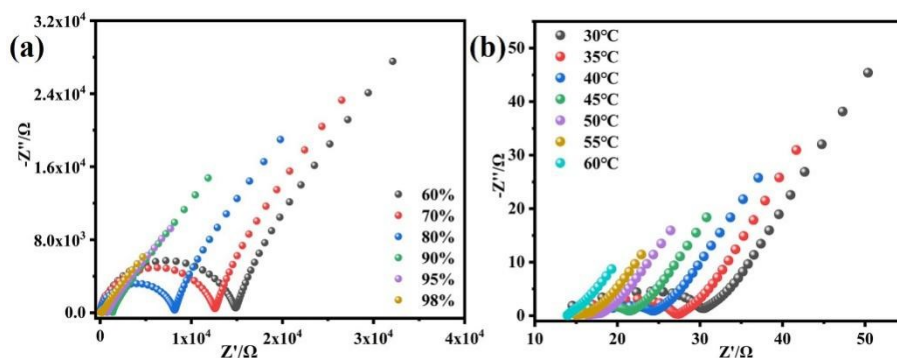

**Fig. S13** Impedance spectra of **MOF-Fe<sub>3</sub>@PP-40** composite membrane at 30 °C with different RHs (a) and 98% RH under different temperatures (b).

**Table S3** The proton conductivity of three membranes under different temperatures with 98% RHs.

| Temperature (°C) | Conductivity of <b>MOF-Fe<sub>3</sub>@PP-20</b> (S cm <sup>-1</sup> ) | Conductivity of <b>MOF-Fe<sub>3</sub>@PP-40</b> (S cm <sup>-1</sup> ) | Conductivity of <b>MOF-Fe<sub>3</sub>@PP-60</b> (S cm <sup>-1</sup> ) |
|------------------|-----------------------------------------------------------------------|-----------------------------------------------------------------------|-----------------------------------------------------------------------|
| 30°C             | $6.01 \times 10^{-4}$                                                 | $8.87 \times 10^{-4}$                                                 | $1.76 \times 10^{-3}$                                                 |
| 35°C             | $7.10 \times 10^{-4}$                                                 | $1.14 \times 10^{-3}$                                                 | $2.18 \times 10^{-3}$                                                 |
| 40°C             | $1.09 \times 10^{-3}$                                                 | $1.37 \times 10^{-3}$                                                 | $2.50 \times 10^{-3}$                                                 |
| 45°C             | $1.45 \times 10^{-3}$                                                 | $1.85 \times 10^{-3}$                                                 | $3.02 \times 10^{-3}$                                                 |
| 50°C             | $1.99 \times 10^{-3}$                                                 | $2.16 \times 10^{-3}$                                                 | $3.53 \times 10^{-3}$                                                 |
| 55°C             | $2.15 \times 10^{-3}$                                                 | $3.00 \times 10^{-3}$                                                 | $3.95 \times 10^{-3}$                                                 |
| 60°C             | $2.47 \times 10^{-3}$                                                 | $3.63 \times 10^{-3}$                                                 | $5.46 \times 10^{-3}$                                                 |

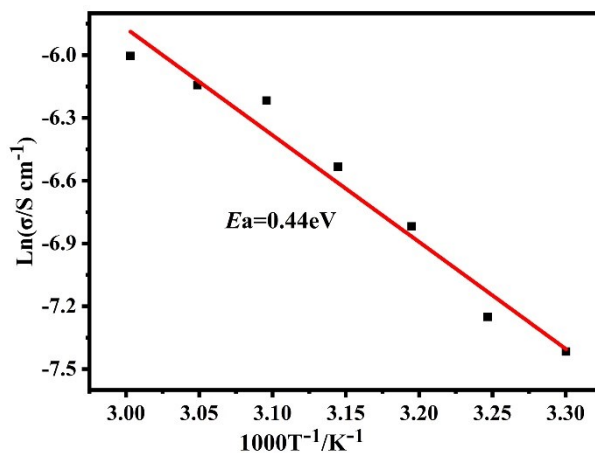

**Fig. S14** Arrhenius plot of the proton conductivities of **MOF-Fe<sub>3</sub>@PP-20** composite membrane.

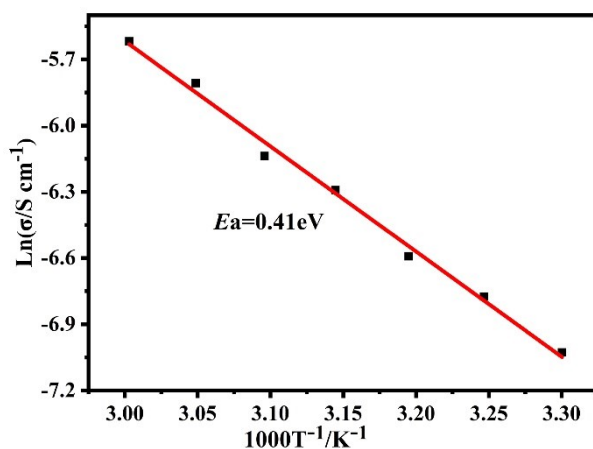

**Fig. S15** Arrhenius plot of the proton conductivities of **MOF-Fe<sub>3</sub>@PP-40** composite membrane.

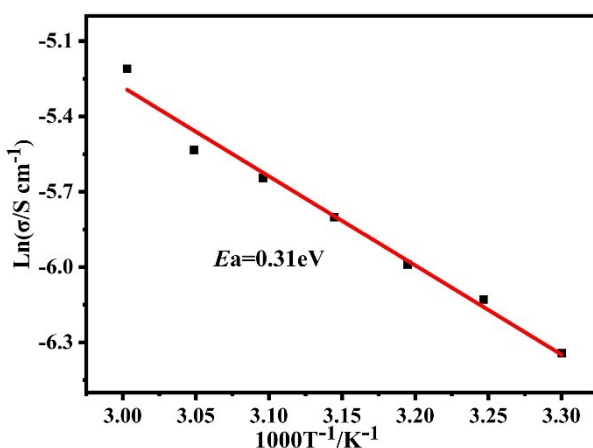

**Fig. S16** Arrhenius plot of the proton conductivities of **MOF-Fe<sub>3</sub>@PP-60** composite membrane.

**Table S4** The proton conductive MOFs and their proton conductivity.

| Materials                       | Proton conductivity (S cm <sup>-1</sup> ) <sup>1)</sup> | Condition     | Refs. |
|---------------------------------|---------------------------------------------------------|---------------|-------|
| MOF-801@PP-X                    | $1.88 \times 10^{-3} \text{ S} \cdot \text{cm}^{-1}$    | 98% RH, 25°C  | 7     |
| JUC-200@PVA-X                   | $1.25 \times 10^{-3} \text{ S} \cdot \text{cm}^{-1}$    | 100% RH, 25°C | 17    |
| MOF-808@PVDF-55                 | $1.56 \times 10^{-4} \text{ S} \cdot \text{cm}^{-1}$    | 100% RH, 65°C | 18    |
| SPEE/S-UiO-66@GO-10             | $1.657 \times 10^{-3} \text{ S} \cdot \text{cm}^{-1}$   | 40% RH, 100°C | 19    |
| HPW@MIL-101/SPEEK               | $6.51 \times 10^{-3} \text{ S} \cdot \text{cm}^{-1}$    | 40% RH, 60°C  | 20    |
| CS/CMMIM@MIL-53(Fe)-75%         | $2.1 \times 10^{-3} \text{ S} \cdot \text{cm}^{-1}$     | 70% RH, 15°C  | 21    |
| PMoV <sub>2</sub> @MIL-101-11.2 | $6.31 \times 10^{-3} \text{ S} \cdot \text{cm}^{-1}$    | 98% RH, 80°C  | 22    |
| MOF-808-OX@PVA-3                | $2.1 \times 10^{-5} \text{ S} \cdot \text{cm}^{-1}$     | 98% RH, 30°C  | 23    |

|                                           |                                                      |                |    |
|-------------------------------------------|------------------------------------------------------|----------------|----|
| Nafion/SmH <sub>2</sub> SP-5              | $2.61 \times 10^{-2} \text{ S} \cdot \text{cm}^{-1}$ | 100% RH, 90°C  | 24 |
| VMT-CNFs                                  | $4.3 \times 10^{-2} \text{ S} \cdot \text{cm}^{-1}$  | 100% RH, 100°C | 25 |
| Cr/sBDC-Gel-0.4 M                         | $7.84 \times 10^{-3} \text{ S} \cdot \text{cm}^{-1}$ | 100% RH, 80°C  | 26 |
| TEPA@ZIF-8-H <sub>2</sub> CO <sub>3</sub> | $5.38 \times 10^{-3} \text{ S} \cdot \text{cm}^{-1}$ | 99% RH, 60°C   | 27 |

**Table. S5** The formation rates of different products under different irradiation times and the selectivity of CO.

| Samples                     | Irradiation time | The formation rate of CO ( $\mu\text{mol} \cdot \text{g}^{-1} \cdot \text{h}^{-1}$ ) | The formation rate of CH <sub>4</sub> ( $\mu\text{mol} \cdot \text{g}^{-1} \cdot \text{h}^{-1}$ ) | The formation rate of H <sub>2</sub> ( $\mu\text{mol} \cdot \text{g}^{-1} \cdot \text{h}^{-1}$ ) | The selectivity of CO |
|-----------------------------|------------------|--------------------------------------------------------------------------------------|---------------------------------------------------------------------------------------------------|--------------------------------------------------------------------------------------------------|-----------------------|
| <b>MOF-Fe<sub>3</sub></b>   | 4.0h             | 6.08                                                                                 | 0                                                                                                 | 0.27                                                                                             | 95.7%                 |
| <b>MOF-Fe<sub>2</sub>Co</b> | 4.0h             | 16.29                                                                                | 0                                                                                                 | 0.637                                                                                            | 96.2%                 |
| <b>MOF-Fe<sub>2</sub>Ni</b> | 4.0h             | 18.41                                                                                | 0                                                                                                 | 0.31                                                                                             | 98.4%                 |
| <b>MOF-Fe<sub>3</sub></b>   | 8.0h             | 4.53                                                                                 | 0                                                                                                 | 0.18                                                                                             | 96.1%                 |
| <b>MOF-Fe<sub>2</sub>Co</b> | 8.0h             | 13.19                                                                                | 0                                                                                                 | 0.095                                                                                            | 99.3%                 |
| <b>MOF-Fe<sub>2</sub>Ni</b> | 8.0h             | 15.81                                                                                | 0                                                                                                 | 0.63                                                                                             | 96.2%                 |

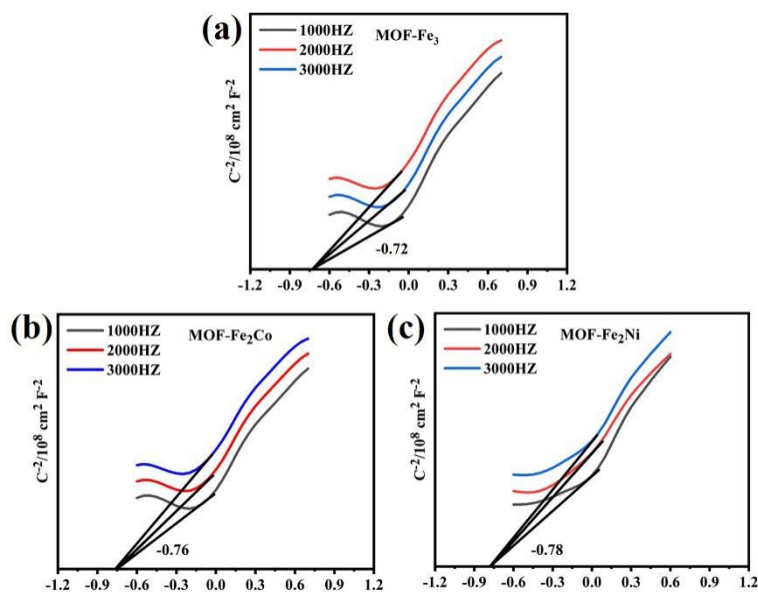

**Fig. S17** Mott-Schottky plots of **MOF-Fe<sub>3</sub>** (a), **MOF-Fe<sub>2</sub>Co** (b) and **MOF-Fe<sub>2</sub>Ni** (c).



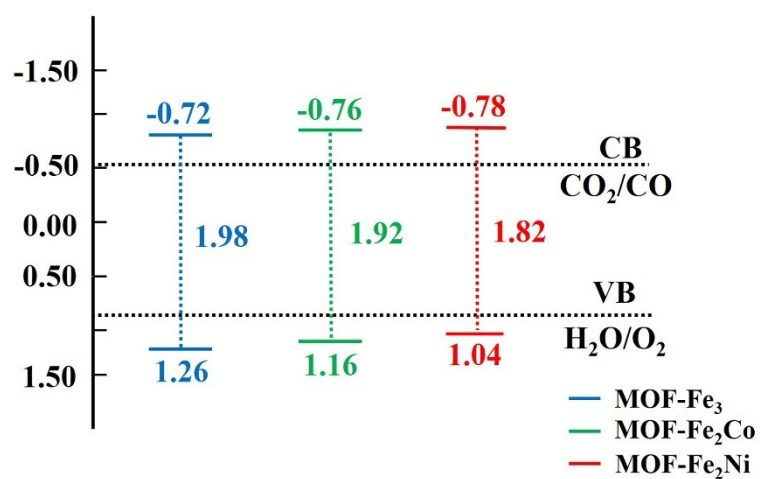

**Fig. S18** Energy level plots of MOF-Fe<sub>2</sub>M.

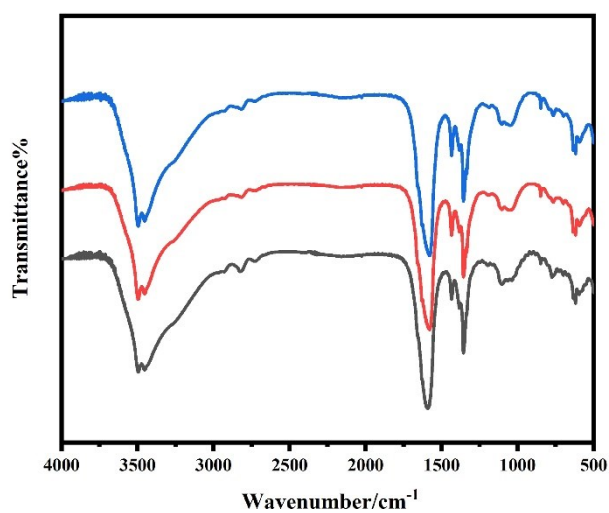

**Fig. S19** FTIR spectra of MOF-Fe<sub>3</sub> (black), after proton conductivity testing (red) and photocatalysis testing (blue).

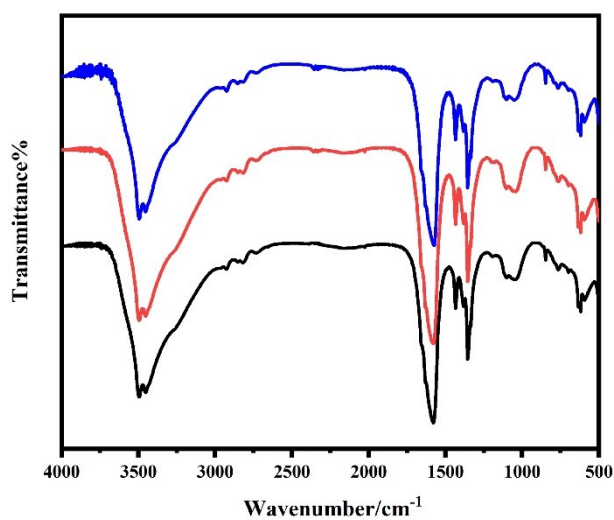

**Fig. S20** FTIR spectra of **MOF-Fe<sub>2</sub>Co** (black), after proton conductivity testing (red) and photocatalysis testing (blue).

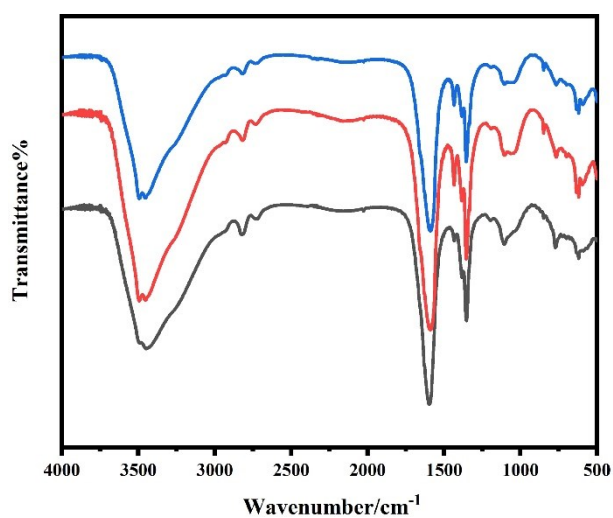

**Fig. S21** FTIR spectra of **MOF-Fe<sub>2</sub>Ni** (black), after proton conductivity testing (red) and photocatalysis testing (blue).

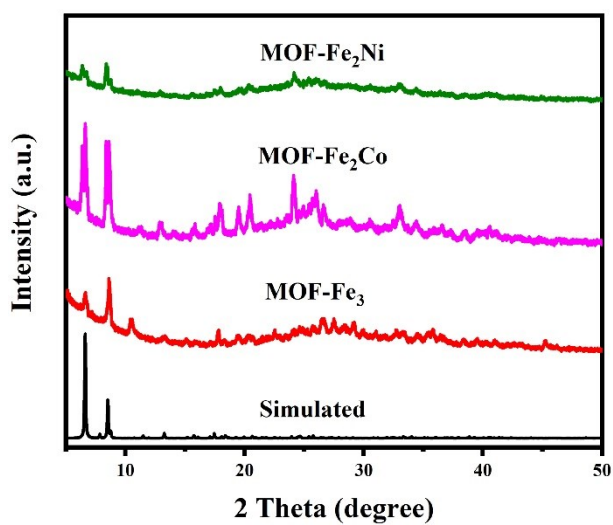

**Fig. S22** PXRD patterns of **MOF-Fe<sub>2</sub>M** after photocatalysis testing.

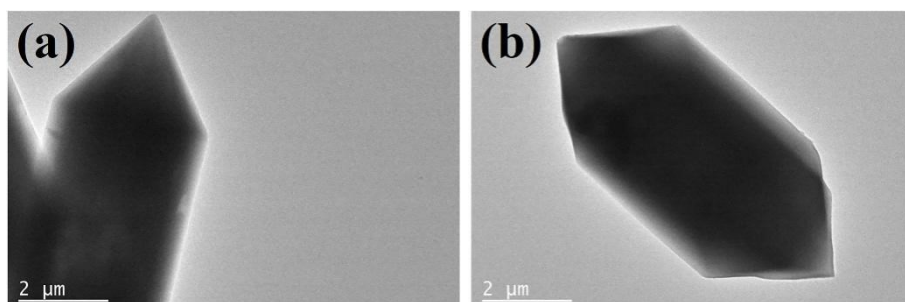

**Fig. S23** The TEM images of **MOF-Fe<sub>2</sub>Ni** before (a) and after (b) CO<sub>2</sub> photoreduction.

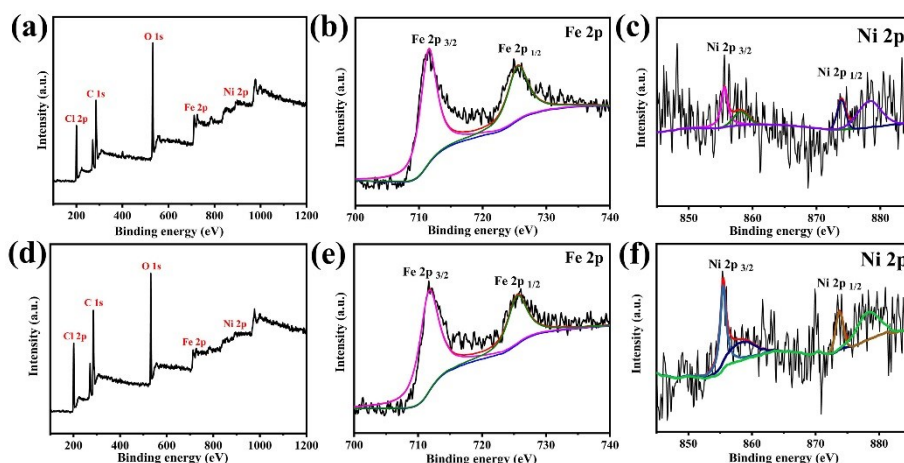

**Fig. S24** XPS spectra of **MOF-Fe<sub>2</sub>Ni** before (a) and after (b) CO<sub>2</sub> photoreduction.

**Table S6** The photocatalytic performances of MOFs.

| Material                           | Products and yields                                                                                    | Reaction pattern | Photosensitizer/Sacrifice agent                     |    |
|------------------------------------|--------------------------------------------------------------------------------------------------------|------------------|-----------------------------------------------------|----|
| PCN-221(Fe <sub>0.2</sub> )        | CO 0.52 $\mu\text{mol g}^{-1}\text{h}^{-1}$                                                            | Solid-liquid     | ethyl acetate/H <sub>2</sub> O                      | 28 |
| Cu <sub>3</sub> (BTC) <sub>2</sub> | CO 11.48 $\mu\text{mol g}^{-1}\text{h}^{-1}$                                                           | Solid-liquid     | CO <sub>2</sub> /H <sub>2</sub> O vapor             | 29 |
| HKUST-1                            | CO 4.537 $\mu\text{mol g}^{-1}\text{h}^{-1}$                                                           | Solid-gas        | terephthalic acid                                   | 29 |
| Ag@Re <sub>3</sub> -MOF-16         | CO —                                                                                                   | Solid-liquid     | MeCN/TEA (20:1)                                     | 30 |
| nm                                 |                                                                                                        |                  |                                                     |    |
| Fe-MIL-101-NH <sub>2</sub>         | CO 4.7 $\mu\text{mol g}^{-1}\text{h}^{-1}$<br>H <sub>2</sub> 2.1 $\mu\text{mol g}^{-1}\text{h}^{-1}$   | Solid-liquid     | MeCN/H <sub>2</sub> O/<br>TEOA (3:2:1)              | 31 |
| AD-MOF-2                           | HCOOH<br>443.2 $\mu\text{mol g}^{-1}\text{h}^{-1}$                                                     | Solid-liquid     | aqueous solution                                    | 32 |
| MOF-253-                           | CO 3.3 $\mu\text{mol g}^{-1}\text{h}^{-1}$                                                             | Solid-liquid     | MeCN (2 mL)                                         | 33 |
| Ru(dcbpy) <sub>2</sub>             | HCOOH 26.7 $\mu\text{mol g}^{-1}\text{h}^{-1}$                                                         |                  |                                                     |    |
| Zr-MOF-525                         | CO 1.52 $\mu\text{mol g}^{-1}\text{h}^{-1}$<br>CH <sub>4</sub> 0.5 $\mu\text{mol g}^{-1}\text{h}^{-1}$ | Solid-liquid     | H <sub>2</sub> O                                    | 34 |
| MAF-7                              | formic acid 1.52 mmol<br>$\text{g}^{-1}\text{h}^{-1}$                                                  | Solid-liquid     | phosphate buffer (100<br>mM, pH=7),<br>TEOA(15w/v%) | 35 |
| Co-Uio-67                          | CO 329 $\mu\text{mol g}^{-1}\text{h}^{-1}$<br>H <sub>2</sub> 709 $\mu\text{mol g}^{-1}\text{h}^{-1}$   | Solid-liquid     | MeCN/H <sub>2</sub> O/TEOA=<br>4:1:1                | 36 |
| NH <sub>2</sub> -MIL-125           | CH <sub>4</sub> 0.69 $\mu\text{mol g}^{-1}\text{h}^{-1}$                                               | Solid-liquid     | H <sub>2</sub> O                                    | 37 |
| PCN-224(Cu)                        | CO 3.72 $\mu\text{mol g}^{-1}\text{h}^{-1}$                                                            | Solid-liquid     | —                                                   | 38 |
| MIL-101-Cr                         | CO 8.3 $\mu\text{mol g}^{-1}\text{h}^{-1}$<br>CH <sub>4</sub> 1.7 $\mu\text{mol g}^{-1}\text{h}^{-1}$  | Solid-liquid     | H <sub>2</sub> O and TEOA                           | 39 |
| NNU-31-Zn                          | HCOOH 1.7 $\mu\text{mol g}^{-1}\text{h}^{-1}$                                                          | Solid-liquid     | H <sub>2</sub> O                                    | 40 |
| NH <sub>2</sub> -MIL-125(Ti)       | CO 0.76 $\mu\text{mol g}^{-1}\text{h}^{-1}$                                                            | Solid-liquid     | Acetonitrile (3mL)<br>triethanolamine (1            | 41 |

|        |                                                          |           |                                 |    |
|--------|----------------------------------------------------------|-----------|---------------------------------|----|
| ZIF-8  | CO 0.68 $\mu\text{mol g}^{-1} \text{h}^{-1}$             | Solid-gas | mL)<br>water(10 $\mu\text{L}$ ) | 42 |
| UiO-66 | CO 1.0 $\mu\text{mol g}^{-1} \text{h}^{-1}$              | Solid-gas | water                           | 43 |
|        | CH <sub>4</sub> 0.6 $\mu\text{mol g}^{-1} \text{h}^{-1}$ |           |                                 |    |

## Notes and references

- [1] F. M. Zhang, L. Z. Dong, J. S. Qin, W. Guan, J. Liu, S. L. Li, M. Lu, Y. Q. Lan, Z. M. Su and H. C. Zhou, Effect of Imidazole Arrangements on Proton-Conductivity in Metal-Organic Frameworks, *J. Am. Chem. Soc.*, 2017, **139**, 6183-6189.
- [2] H. B. Luo, Q. Ren, P. Wang, J. Zhang, L. F. Wang and X. M. Ren, High Proton Conductivity Achieved by Encapsulation of Imidazole Molecules into Proton-Conducting MOF-808, *ACS Appl. Mater. Interfaces.*, 2019, **11**, 9164-9171.
- [3] P. G. M. Mileo, K. Adil, L. Davis, A. Cadiou, Y. Belmabkhout, H. Aggarwal, G. Maurin, M. Eddaoudi and S. Devautour-Vinot, Achieving Superprotonic Conduction with a 2D Fluorinated Metal-Organic Framework, *J. Am. Chem. Soc.*, 2018, **140**, 13156-13160.
- [4] S. Chand, W. H. Deng, A. Pal and M. C. Das, Polycarboxylate-Templated Coordination Polymers: Role of Templates for Superprotonic Conductivities of up to  $10^{-1} \text{ S cm}^{-1}$ , *Angew. Chem. Int. Ed.*, 2018, **57**, 6662-6666.
- [5] Y. X. Ye, W. G. Guo, L. H. Wang, Z. Y. Li, Z. J. Song, J. Chen, Z. J. Zhang, S. C. Xiang and B. L. Chen, Straightforward Loading of Imidazole Molecules into Metal-Organic Framework for High Proton Conduction, *J. Am. Chem. Soc.*, 2017, **139**, 15604-15607.
- [6] T. He, Y. Z. Zhang, H. Wu, X. J. Kong, X. M. Liu, L. H. Xie, Y. B. Dou and J. R. Li, Functionalized Base-Stable Metal-Organic Frameworks for Selective CO<sub>2</sub> Adsorption and Proton Conduction, *ChemPhysChem.*, 2017, **18**, 3245-3252.
- [7] J. Zhang, H. J. Bai, Q. Ren, H. B. Luo, X. M. Ren, Z. F. Tian and S. F. Lu, Extra Water- and Acid-Stable MOF-801 with High Proton Conductivity and Its Composite Membrane for Proton-Exchange Membrane, *ACS Appl. Mater. Interfaces.*, 2018, **10**, 28656-28663.
- [8] S. Khatua, A. K. Bar, J. A. Sheikh, A. Clearfield and S. Konar, Achieving Amphibious Superprotonic Conductivity in a CuI Metal-Organic Framework by Strategic Pyrazinium Salt Impregnation, *Chem. Eur. J.*, 2018, **24**, 872-880.
- [9] R. L. Liu, Y. R. Liu, S. H. Yu, C. L. Yang, Z. F. Li and G. Li, A Highly Proton-Conductive 3D Ionic Cadmium-Organic Framework for Ammonia and Amines Impedance Sensing, *ACS Appl. Mat. Interfaces.*, 2019, **11**, 1713-1722.
- [10] J. X. Wang, Y. D. Wang, M. J. Wei, H. Q. Tan, Y. H. Wang, H. Y. Zang and Y. G. Li, Inorganic open framework based on lanthanide ions and polyoxometalates with high proton conductivity, *Inorg. Chem. Front.*, 2018, **5**, 1213-1217.
- [11] P. Rought, C. Marsh, O. Igo, S. Pili, V. G. Sakai, M. Li, M. S. Brown, S. P. Argent, I. Vitorica-Yrezabal, G. Whitehead, M. R. Warren, S. Yang and M. Schröder, Modulating proton diffusion and conductivity in metal-organic frameworks by incorporation of accessible free carboxylic acid groups, *Chem. Sci.*, 2019, **10**, 1492-1499.
- [12] S. S. Wang, X. Y. Wu, Z. Li, C. Z. Lu, Designed synthesis of a proton-conductive Ho-MOF

- with reversible dehydration and hydration, Dalton Transactions., 2019, **48**, 9930-9934.
- [13] G. Y. Zhang and H. H. Fei, Missing metal-linker connectivities in a 3-D robust sulfonate-based metal-organic framework for enhanced proton conductivity, Chem. Commun., 2017, **53**, 4156-4159.
- [14] S. S. Park, A. J. Rieth, C. H. Hendon and M. Dincă, Selective Vapor Pressure Dependent Proton Transport in a Metal-Organic Framework with Two Distinct Hydrophilic Pores, J. Am. Chem. Soc., 2018, **140**, 2016-2019.
- [15] H. B. Luo, Q. Ren, Y. Liu, Proton Conduction of an Acid-Resistant Open-Framework Chalcogenidometalate Hybrid in Anhydrous versus Humid Environments, Inorg. Chem., 2020, **59**, 7283-7289.
- [16] R. L. Liu, W. T. Qu, B. H. Dou, Proton-Conductive 3D LnIII Metal-Organic Frameworks for Formic Acid Impedance Sensing, Chem Asian J., 2020, **15**, 182-190.
- [17] K. Cai, F. Sun, X. Q. Liang, C. Liu, N. Zhao, X. Q. Zou and G. S. Zhu, An acid-stable hexaphosphate ester based metal-organic framework and its polymer composite as proton exchange membrane, J. Mater. Chem. A., 2017, **5**, 12943-12950.
- [18] H. B. Luo, M. Wang, S. X. Liu, C. Xue, Z. F. Tian, Y. Zou and X. M. Ren, Proton Conductance of a Superior Water-Stable Metal-Organic Framework and Its Composite Membrane with Poly(vinylidene fluoride), Inorg. Chem., 2017, **56**, 4169-4175.
- [19] H. Z. Sun, B. B. Tang and P. Y. Wu, Rational Design of S-UiO-66@GO Hybrid Nanosheets for Proton Exchange Membranes with Significantly Enhanced Transport Performance, ACS Appl. Mater. Interfaces., 2017, **9**, 26077-26087.
- [20] B. Zhang, Y. Cao, Z. Li, H. Wu, Y. Yin, L. Cao, X. He, Z. Jiang, Responses to comments on "Ni nanoparticle-decorated reduced graphene oxide for non-enzymatic glucose sensing: An experimental and modeling study, Acta., 2017, **240**, 186-194.
- [21] X. F. Zheng, X. Y. Zhao, J. Huang, H. Yang, Z. Liu, Photo-assisted green synthesis of silver doped silk fibroin/carboxymethyl cellulose nanocomposite hydrogels for biomedical applications, Appl Organomet Chem., 2020, e5981.
- [22] F. L. Wang, C. Y. Liang, J. Y. Tang, F. Zhang, F. Y. Qu, The promotion of proton conductivity by immobilizing molybdovanadophosphoric acids in metal-organic frameworks, New J. Chem., 2020, **44**, 1912-1920.
- [23] X. Meng, H. N. Wang, L. S. Wang, Y. H. Zou, Z. Y. Zhou, Enhanced proton conductivity of a MOF-808 framework through anchoring organic acids to the zirconium clusters by post-synthetic modification, CrystEngComm., 2019, **21**, 3146-3150.
- [24] B. G. Montse, R. S. Ines, M. P. C. Rosario, Layered Lanthanide Sulfophosphonates and Their Proton Conduction Properties in Membrane Electrode Assemblies, Chem. Mater., 2019, **31**, 9625-9634.
- [25] X. Gu, B. Li, F. L. Li, K. Zhang, M. H. Guo, Transparent and flexible vermiculite-cellulose nanofiber composite membranes with high-temperature proton conduction, J. Am. Chem. Soc., 2019, **54**, 5528-5535.
- [26] M. Qiu, H. Wu, L. Cao, B. B. Shi, X. Y. He, H. B. Geng, X. L. Mao, P. F. Yang and Z. Y. Jiang. Metal-Organic Nanogel with Sulfonated Three-Dimensional Continuous Channels as a Proton Conductor, ACS Appl. Mater. Interfaces., 2020, **12**, 19788-19796.
- [27] Q. Ren, J. W. Yu, H. B. Luo, J. Zhang, L. Wang, X. M. Ren, Design and Preparation of a

- Superior Proton Conductor by Confining Tetraethylenepentamine in the Pores of ZIF-8 To Induce Further Adsorption of Water and Carbon Dioxide, *Inorg. Chem.*, 2019, **58**, 14693-14700.
- [28] L. Y. Wu, Y. F. Mu, X. X. Guo, Encapsulating Perovskite Quantum Dots in Iron-Based Metal-Organic Frameworks (MOFs) for Efficient Photocatalytic CO<sub>2</sub> Reduction, *Angew. Chem. Int. Ed.*, 2019, **58**, 9491-9495.
- [29] X. He, Z. R. Gan, S. Fisenko, D. W. Wang, H. M. El-Kader and W. N. Wang, Rapid Formation of Metal-Organic Frameworks (MOFs) Based Nanocomposites in Microdroplets and Their Applications for CO<sub>2</sub> Photoreduction, *Acs Appl. Mater. Interfaces.*, 2017, **9**, 9688-9698.
- [30] K. M. Choi, D. Kim, B. Rungtawevoranit, C. A. Trickett, J. T. D. Barmanbek, A. S. Alshammari, P. D. Yang and O. M. Yaghi, Plasmon-Enhanced Photocatalytic CO<sub>2</sub> Conversion within Metal–Organic Frameworks under Visible Light, *J. Am. Chem. Soc.*, 2017, **139**, 356-362.
- [31] Q. Jiani, S. Wang, X. Wang, Visible-light reduction CO<sub>2</sub> with dodecahedral zeolitic imidazolate framework ZIF-67 as an efficient co-catalyst, *Appl. Catal. B.*, 2017, **209**, 476-482.
- [32] N. Li, J. Liu, J. J. Liu, L. Z. Dong, Z. F. Xin, Y. L. Teng, Y. Q. Lan, Adenine Components in Biomimetic Metal-Organic Frameworks for Efficient CO<sub>2</sub> Photoconversion, *Angew. Chem. Int. Ed.*, 2019, **58**, 5226-5231.
- [33] X. Y. Deng, Y. H. Qin, M. M. Hao and Z. H. Li, MOF-253-Supported Ru Complex for Photocatalytic CO<sub>2</sub> Reduction by Coupling with Semidehydrogenation of 1,2,3,4-Tetrahydroisoquinoline (THIQ), *Inorg. Chem.*, 2019, **58**, 16574-16580.
- [34] W. Y. Gao, H. T. Ngo, Z. Niu, W. J. Zhang, Y. X. Pan, Z. Y. Yang, V. R. Bhethanabotla, B. Joseph, Chemoenzymatic Synthesis of 5-Hydroxymethylfurfural (HMF)-Derived Plasticizers by Coupling HMF Reduction with Enzymatic Esterification, *ChemSusChem.*, 2020, **13**, 1864-5631.
- [35] Y. Tian, Y. Zhou, Y. Z. Zong, J. S. Li, N. Yang, M. Zhang, Z. Q. Guo and H. Song, Construction of Functionally Compartmental Inorganic Photocatalyst-Enzyme System via Imitating Chloroplast for Efficient Photoreduction of CO<sub>2</sub> to Formic Acid, *ACS Appl. Mater. Interfaces.*, 2020, **12**, 34795-34805.
- [36] X. S. Gao, B. Guo, C. M. Guo, Q. Meng, J. Liang and J. X. Liu, Zirconium-Based Metal-Organic Framework for Efficient Photocatalytic Reduction of CO<sub>2</sub> to CO: The Influence of Doped Metal Ions, *ACS Appl. Mater. Interfaces.*, 2020, **12**, 24059-24065.
- [37] J. Hu, J. Ding, Q. Zhong, In situ fabrication of amorphous TiO<sub>2</sub>/NH<sub>2</sub>-MIL-125(Ti) for enhanced photocatalytic CO<sub>2</sub> into CH<sub>4</sub> with H<sub>2</sub>O under visible-light irradiation, *J. Colloid. Interf. sci.*, 2020, **560**, 857-865.
- [38] L. Wang, P. X. Jin, J. W. Huang, H. She and Q. Z. Wang, Integration of Copper(II)-Porphyrin Zirconium Metal-Organic Framework and Titanium Dioxide to Construct Z-Scheme System for Highly Improved Photocatalytic CO<sub>2</sub> Reduction, *ACS Sustainable Chem. Eng.*, 2019, **7**, 15660-15670.
- [39] Y. Xie, Z. B. Fang, L. Li, H. X. Yang and T. F. Liu, Creating Chemisorption Sites for Enhanced CO<sub>2</sub> Photoreduction Activity through Alkylamine Modification of MIL-101-Cr, *ACS Appl. Mater. Interfaces.*, 2019, **11**, 27017-27023.
- [40] L. Z. Dong, L. Zhang, J. Liu, Q. Huang, M. Lu, W. X. Ji and Y. Q. Lan, Stable Heterometallic Cluster-Based Organic Framework Catalysts for Artificial Photosynthesis, *Angew. Chem. Int.*

Ed., 2020, **59**, 2659-2663.

- [41] S. Y. Chen, G. T. Hai, H. Y. Gao, X. Chen, A. Li, X. W. Zhang, W. J. Dong, Modulation of the charge transfer behavior of Ni(II)-doped NH<sub>2</sub>-MIL-125(Ti): Regulation of Ni ions content and enhanced photocatalytic CO<sub>2</sub> reduction performance, *Chem. Eng. J.*, 2021, **406**, 126886-126895.
- [42] Z. C. Kong, J. F. Liao, Y. J. Dong, Y. F. Xu, H. Y. Chen, D. B. Kuang and C. Y. Su, Core@Shell CsPbBr<sub>3</sub>@Zeolitic Imidazolate Framework Nanocomposite for Efficient Photocatalytic CO<sub>2</sub> Reduction, *ACS Energy Lett.*, 2018, **3**, 2656-2662.
- [43] Y. J. Ma, Q. Tang, W. Y. Sun, Z. Y. Yao, W. H. Zhu, T. Li, J. Y. Wang, Assembling ultrafine TiO<sub>2</sub> nanoparticles on UiO-66 octahedrons to promote selective photocatalytic conversion of CO<sub>2</sub> to CH<sub>4</sub> at a low concentration, *Appl. Catal. B-Environ.*, 2020, **270**, 118856-118891.
